# Supplementary material for: The role of PD-1/PD-L1 pathway in ulcerative colitis and changes following tonsil-derived mesenchymal stem cells treatment
Source: PubMed Central journal article supplement — Korean J Intern Med. 2024 Nov 1;39(6):917–30. doi: 10.3904/kjim.2024.019 (PMC11569929; doi:10.3904/kjim.2024.019), 2024-11-01
Supplement: kjim-2024-019-Supplementary-Figure-1.pdf [file kjim-2024-019-Supplementary-Figure-1.pdf]

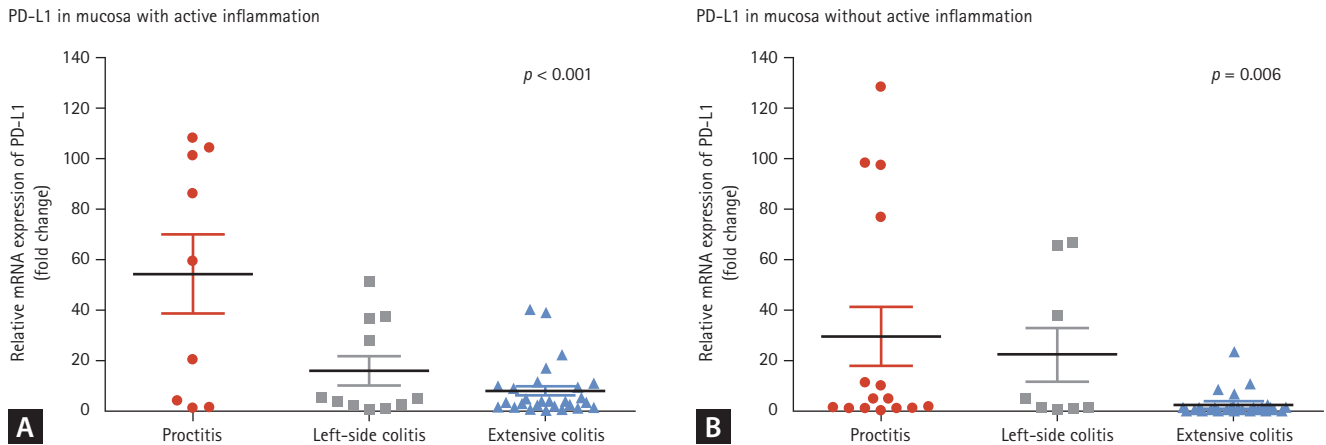

**Supplementary Figure 1.** Expression of PD-L1 according to the maximal disease extent in the colonic mucosa with (A) and without active inflammation (B) in patients with ulcerative colitis. When comparing the levels of PD-1 and PD-L1 to distinguish between mucosa with and without active inflammation, we observed a decrease in PD-L1 levels with increasing disease extent in both analyses, but this difference was more pronounced in mucosa with active inflammation ( $p < 0.001$  in mucosa with active inflammation and  $p = 0.006$  in mucosa without active inflammation, respectively). PD-L1, programmed death-ligand 1; PD-1, programmed death 1.
